# Supplementary material for: Out of pocket payments and access to NCD medication in two regions in Albania
Source: PLoS One. 2022 Aug 10;17(8):e0272221. doi: 10.1371/journal.pone.0272221 (PMC9365190; doi:10.1371/journal.pone.0272221)
Supplement: S2 Data — (XLS) [file pone.0272221.s002.xls]

## Sheet: codebook
variable name	description	values
qark	district	1 = Diber, 2 = Fier
village	village	101-142 (Diber), 201-240 (Fier)
urban_rural	Urban/Rural	1 = rural, 2 = urban
v22	Is any dweller in this dwelling/apartment benefitting from any ecomomic or social aid scheme?	0 = no, 1 = yes
v27	Sex	1 = male, 2 = female
age	age	yrs
older	age > = 60	0 = no, 1 = yes
v30	Present civil status	1 = married, 2 = divorced, 3 = separated, 4 = widowed, 5 = single
v37	ownership of a valid health insurance	0 = no, 1 = yes
chronic diseases
v4121	hypertension	0 = no, 1 = yes
v3122	diabetes	0 = no, 1 = yes
v4123	heart problems	0 = no, 1 = yes
v4124	stroke	0 = no, 1 = yes
v4125	cancer	0 = no, 1 = yes
v4126	respiratory disease	0 = no, 1 = yes
v4127	mental disorder	0 = no, 1 = yes
v4128	disease of the nervous system	0 = no, 1 = yes
v4129	rheumatism	0 = no, 1 = yes
v41288	other	0 = no, 1 = yes
v45	Do you encounter any difficulties in seeking regular care for your chronic condition or disability?	0 = no, 1 = yes
v57	Costs in Albanian LEK for treatment (consultation/visit) relating to chronic condition or disability from the past 4/8 weeks
v58	Costs in Albanian LEK for transport relating to chronic condition or disability from the past 4/8 weeks
v59	Costs in Albanian LEK for tests purchased relating to chronic condition or disability from the past 4/8 weeks
v59a	Costs in Albanian LEK for drugs purchased relating to chronic condition or disability from the past 4/8 weeks
